# Supplementary material for: Targeted next generation sequencing of mucosal melanomas identifies frequent NF1 and RAS mutations
Source: PubMed Central journal article supplement (PMC5522195; doi:10.18632/oncotarget.16542), 2017-03-24
Supplement: oncotarget-08-40683-s001.pdf [file oncotarget-08-40683-s001.pdf]

## Targeted next generation sequencing of mucosal melanomas identifies frequent *NF1* and *RAS* mutations

### SUPPLEMENTARY FIGURES AND TABLES

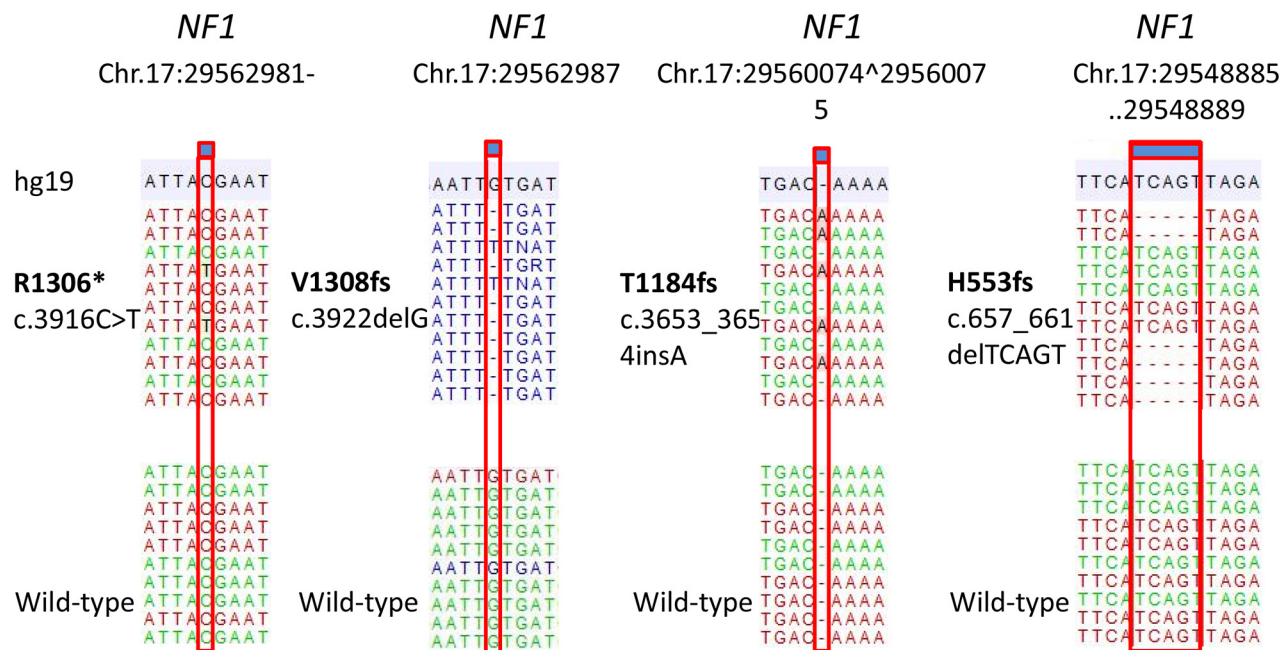

**Supplementary Figure 1: Inactivating *NF1* mutations in mucosal melanomas.** Targeted sequencing results of four exemplary mucosal melanoma samples revealing inactivating *NF1* mutations. Mutations are shown at the top with a representative wild-type sequence at the bottom. The mutation site is highlighted by the red box. Mutations are annotated according to human genome assembly 19 (hg19).

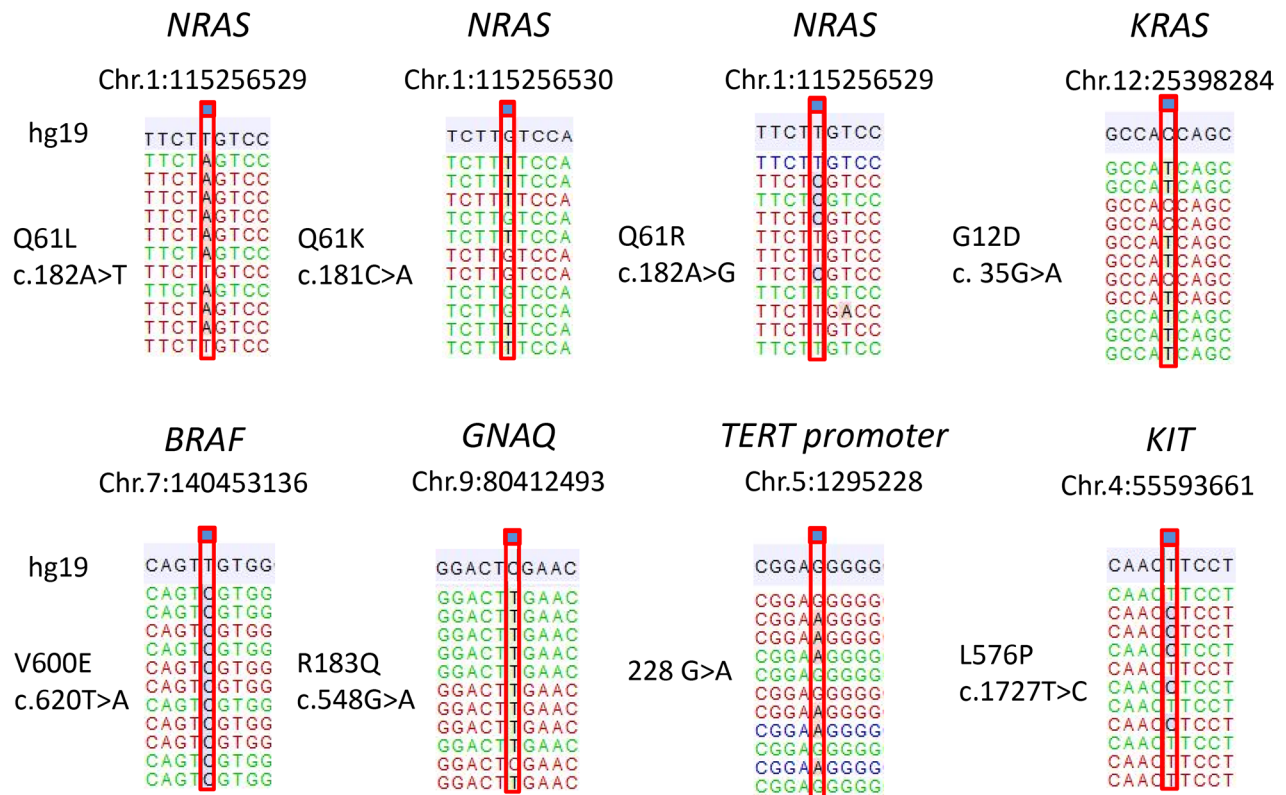

**Supplementary Figure 2: Examples of activating mutations in mucosal melanomas.** From left to right, representative examples of *NRAS*, *KRAS*, *BRAF*, *GNAQ*, *TERT promoter* and *KIT* mutations determined by targeted next generation sequencing. The mutation site is highlighted by the red box. Mutations are annotated according to human genome assembly 19 (hg19).

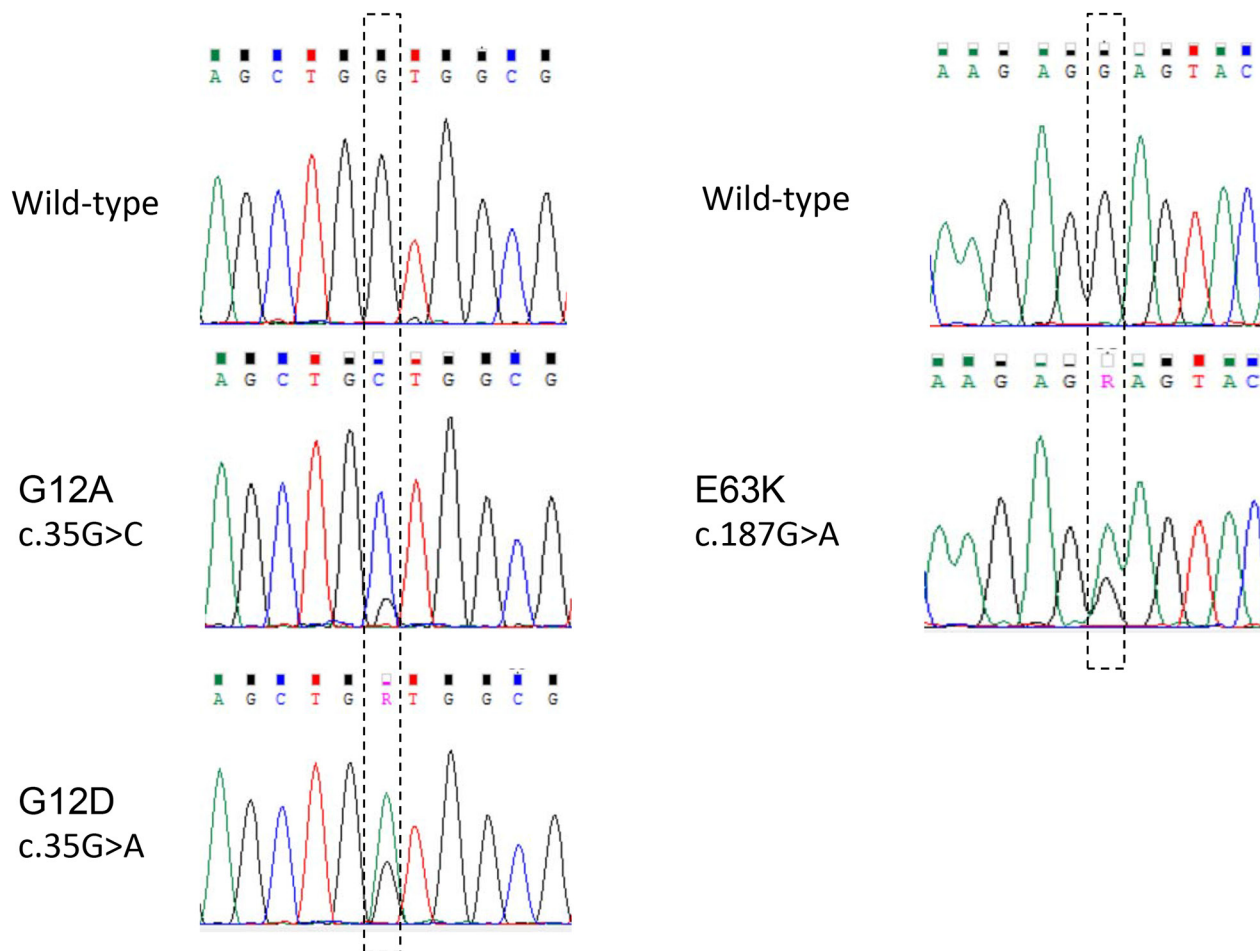

**Supplementary Figure 3: Sanger sequencing of NGS identified *KRAS* mutations.** Demonstrated are chromatograms of Sanger sequencing validating the *KRAS* mutations identified by our next-generation sequencing panel approach. Wild-type chromatograms are shown on the top. The G12A (c.35G>C) and G12D (c.35G>A) mutations identified in exon 1 are demonstrated on the left, the E63K (c.187G>A) mutation in exon 2 is shown on the right.

Supplementary Table 1: List of analyzed tumor samples with cDNA annotation and allele frequencies.

See Supplementary File 1

Supplementary Table 2: Clinical and pathological data of *BRAF*-mutant tumors

| <i>BRAF</i><br>mut. | site | sex | tissue | epithelial tumor<br>component | Treatment                         |                                         | alive |
|---------------------|------|-----|--------|-------------------------------|-----------------------------------|-----------------------------------------|-------|
|                     |      |     |        |                               | BRAF <sup>i</sup>                 | BRAF <sup>i</sup> plus MEK <sup>i</sup> |       |
| V600E               | HN   | M   | P      | yes                           | no                                | no                                      | no    |
| V600E               | G    | F   | P      | yes                           | no                                | no                                      | no    |
| V600K               | A    | F   | P      | yes                           | yes (1 year)<br>Partial response* | no                                      | no    |
| V600E               | HN   | M   | M      | NK                            | no                                | no                                      | no    |
| V600E               | D    | F   | P      | yes                           | no                                | no                                      | no    |
| N188S               | G    | F   | P      | yes                           | no                                | no                                      | no    |

*M* metastasis; *P* primary tumor; *NK* not known; *HN* Head and Neck, *G* Genital area, *A* Anorectum, *D* Digestive tract,

\* patient initially showed a partial response then stable disease and upon progression after 1 year BRAF inhibitor therapy was discontinued.

Supplementary Table 3: Targeted next generation sequencing panel

| Nr. | Gene          | Primary Melanoma type | Customary Mutation Type | Target Bases | Bases covered | Primer pairs |
|-----|---------------|-----------------------|-------------------------|--------------|---------------|--------------|
| 1   | BRAF          | cutaneous             | activating              | 2860         | 2456          | 40           |
| 2   | NRAS          | cutaneous             | activating              | 650          | 650           | 10           |
| 3   | KIT           | cutaneous             | activating              | 3354         | 3264          | 51           |
| 4   | HRAS          | cutaneous             | activating              | 780          | 667           | 11           |
| 5   | KRAS          | cutaneous             | activating              | 787          | 787           | 13           |
| 6   | CDKN2A        | cutaneous             | tumorsuppressor         | 1184         | 713           | 14           |
| 7   | PTEN          | cutaneous             | tumorsuppressor         | 1392         | 1248          | 22           |
| 8   | CDK4          | cutaneous             |                         | 1052         | 1052          | 19           |
| 9   | TP53          | cutaneous             | tumorsuppressor         | 1503         | 1396          | 26           |
| 10  | RAC1          | cutaneous             |                         | 776          | 721           | 14           |
| 11  | NF1           | cutaneous             | tumorsuppressor         | 9900         | 9167          | 143          |
| 12  | PIK3CA        | cutaneous             |                         | 3607         | 3313          | 50           |
| 13  | MAP2K2        | cutaneous             |                         | 1423         | 1240          | 24           |
| 14  | PIK3R1        | cutaneous             |                         | 2637         | 2627          | 42           |
| 15  | MITF          | cutaneous             |                         | 2066         | 2066          | 35           |
| 16  | TERT          | cutaneous             |                         | 3719         | 2371          | 39           |
|     | TERT Promoter | cutaneous             | activating              | 28           | 28            | 1            |
| 17  | ARID2         | cutaneous             | tumorsuppressor         | 5928         | 5830          | 82           |
| 18  | ARID1A        | cutaneous             | tumorsuppressor         | 7258         | 6132          | 81           |
| 19  | SMARCA4       | cutaneous             | tumorsuppressor         | 5761         | 5040          | 88           |
| 20  | MAP2K1        | cutaneous             |                         | 1436         | 1436          | 26           |
| 21  | CTNNB1        | cutaneous             |                         | 2626         | 2626          | 40           |
| 22  | EZH2          | cutaneous             |                         | 2680         | 2680          | 46           |
| 23  | IDH1          | cutaneous             |                         | 1405         | 1394          | 22           |
| 24  | FBXW7         | cutaneous             |                         | 2898         | 2808          | 43           |
| 25  | WT1           | cutaneous             |                         | 1784         | 1282          | 24           |
| 26  | GNAQ          | uveal                 | activating              | 1220         | 1064          | 17           |
| 27  | GNA11         | uveal                 | activating              | 1220         | 944           | 14           |
| 28  | BAP1          | uveal                 | tumorsuppressor         | 2599         | 2380          | 39           |
| 29  | SF3B1         | uveal                 |                         | 4455         | 4412          | 72           |
